# Supplementary material for: Elimination of bacterial DNA during RNA isolation from sputum: Bashing bead vortexing is preferable over prolonged DNase treatment
Source: PubMed Central journal article supplement (PMC6438495; doi:10.1371/journal.pone.0214609), 2019-03-28
Supplement: pone.0214609.s004.pdf [file pone.0214609.s004.pdf]

---

| <b>RNA isolation kits</b> | <b>No beads</b> | <b>Glass beads</b> | <b>Bashing beads</b> |
|---------------------------|-----------------|--------------------|----------------------|
| TriPep                    | ****            | ***                | *                    |
| Trizol                    | ***             | **                 | *                    |
| Direct-zol                | ***             | **                 | **                   |
| RNeasy Plus               | ***             | **                 | None                 |

---
